# Supplementary material for: Direct formation of interlayer exciton in two-dimensional van der Waals heterostructures
Source: Royal Society of Chemistry journal article supplement (doi:10.1039/d1mh00571e), 2021-01-01
Supplement: d1mh00571e1.pdf [file d1mh00571e1.pdf]

## Supporting Information

### **Direct formation of interlayer exciton in two-dimensional van der Waals heterostructures**

Xianghong Niu<sup>1</sup>, Shanshan Xiao<sup>3</sup>, Dazhong Sun<sup>1</sup>, Anqi Shi<sup>3</sup>, Zhaobo Zhou<sup>2</sup>, Wei Chen<sup>1</sup>, Xing'ao

Li<sup>1,3</sup>, Jinlan Wang<sup>2\*</sup>

<sup>1</sup> New Energy Technology Engineering Laboratory of Jiangsu Province & School of Science,  
Nanjing University of Posts and Telecommunications, Nanjing 210023, China

<sup>2</sup> School of Physics, Southeast University, Nanjing 211189, China

<sup>3</sup> Key Laboratory for Organic Electronics and Information Displays & Institute of  
Advanced Materials (IAM), Jiangsu National Synergistic Innovation Center for  
Advanced Materials (SICAM), Nanjing University of Posts and Telecommunications,  
Nanjing 210023, China

\*Correspondence to: [jlwang@seu.edu.cn](mailto:jlwang@seu.edu.cn)

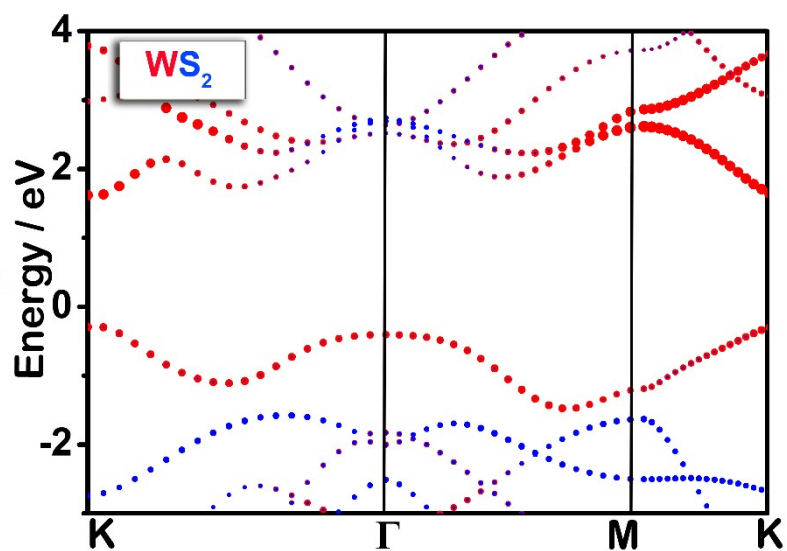

**Figure S1** Projection-resolved band structure of WS. Red and blue indicate the projection on W and S atoms, respectively.

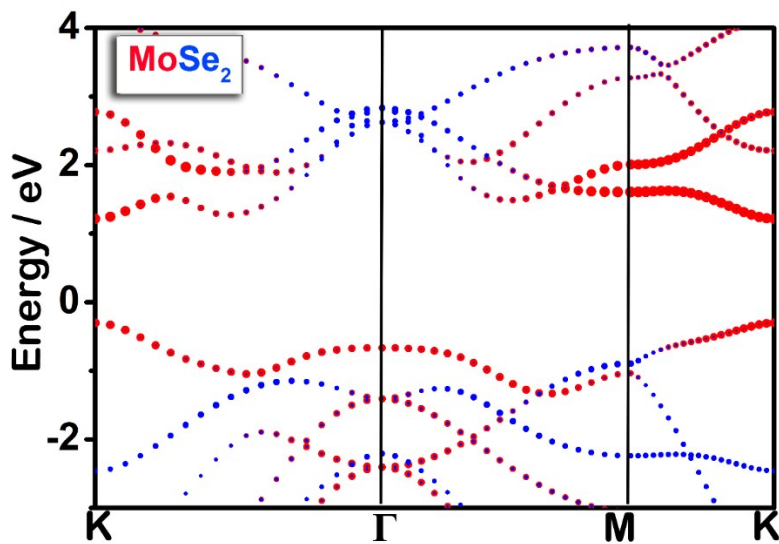

**Figure S2** Projection-resolved band structure of MoSe<sub>2</sub>. Red and blue indicate the projection on Mo and Se atoms, respectively.

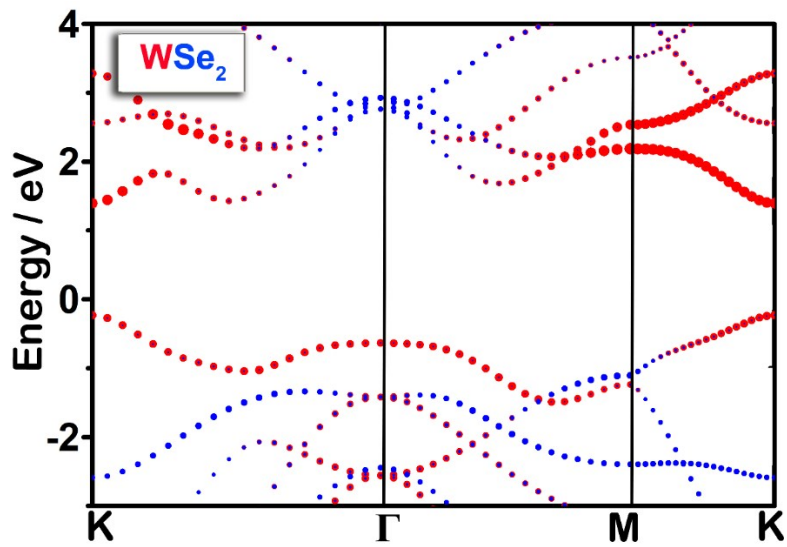

**Figure S3** Projection-resolved band structure of WSe<sub>2</sub>. Red and blue indicate the projection on W and Se atoms, respectively.

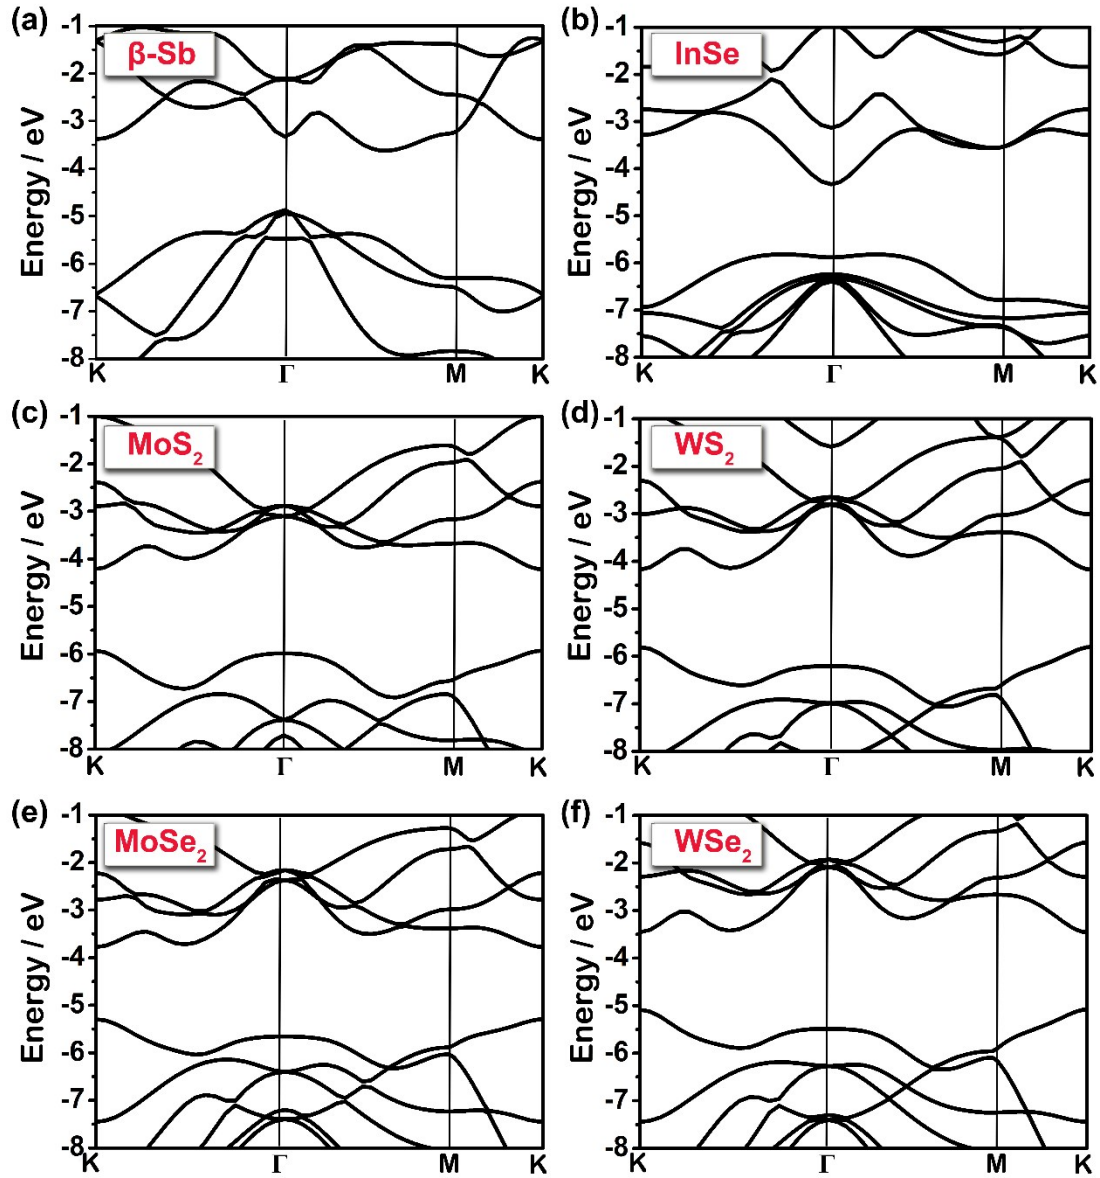

**Figure S4** Band structure of (a)  $\beta$ -Sb, (b) InSe, (c) MoS<sub>2</sub>, (d) WS<sub>2</sub>, (e) MoSe<sub>2</sub> and (f) WSe<sub>2</sub>. The energy bands of different systems are aligned to the same vacuum level.

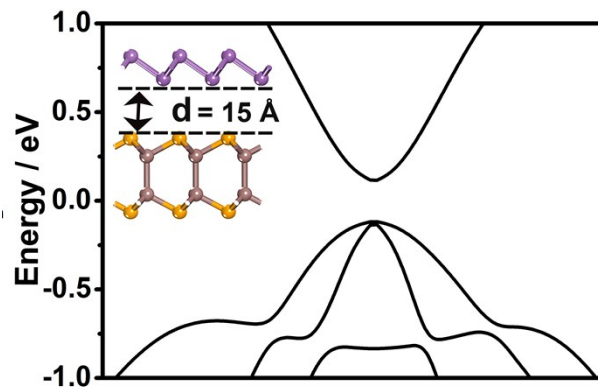

**Figure S5** Electronic structure of InSe/ $\beta$ -Sb heterostructure with interlayer distance of 15 Å. The large interlayer distance indicates that there is no interlayer interaction between InSe and  $\beta$ -Sb layer.

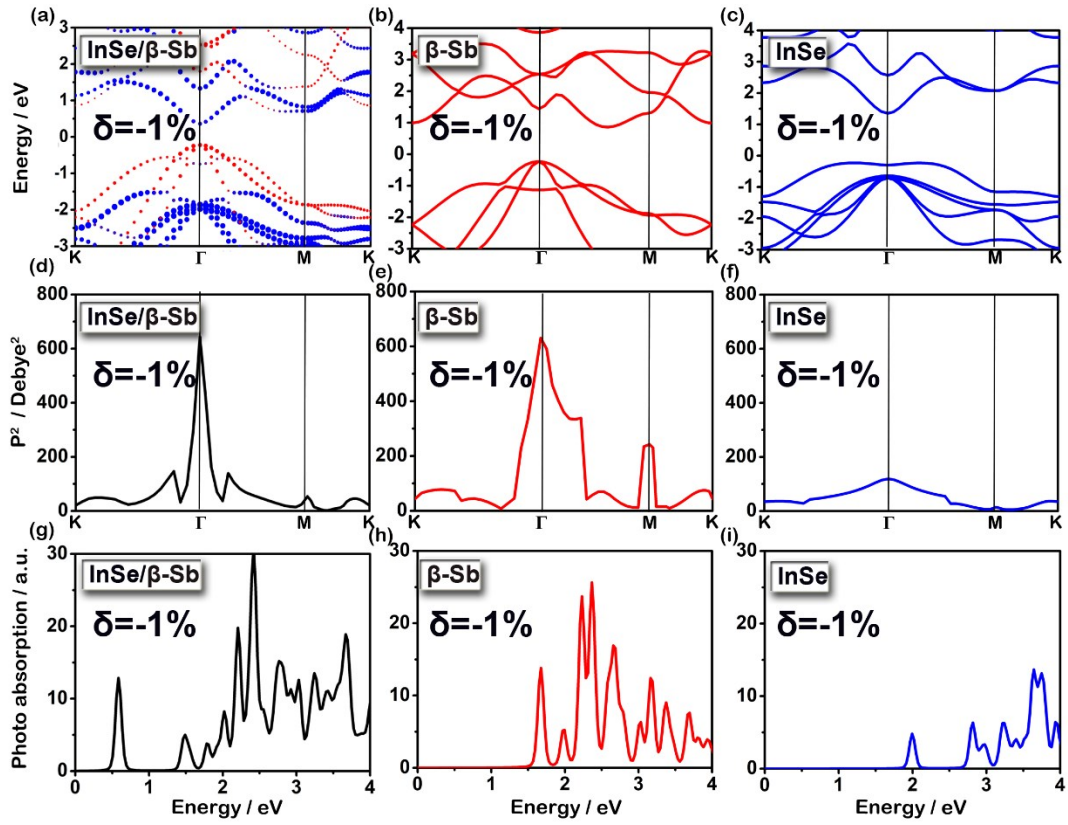

**Figure S6** Under lateral compressive stress -1%: The band structure of (a) InSe/β-Sb heterostructure, (b) β-Sb and (c) InSe sublayer, respectively. The bands plotted in red and blue in (a) denote the bands dominated by β-Sb and InSe layer, respectively. The square of transition dipole moment between the highest valence band and the lowest conduction band for (d) InSe/β-Sb heterostructure, and individual (e) β-Sb, (f) InSe layers, respectively. Photo-absorption properties of (g) InSe/β-Sb heterostructure and individual (h) β-Sb, (i) InSe layers, respectively.

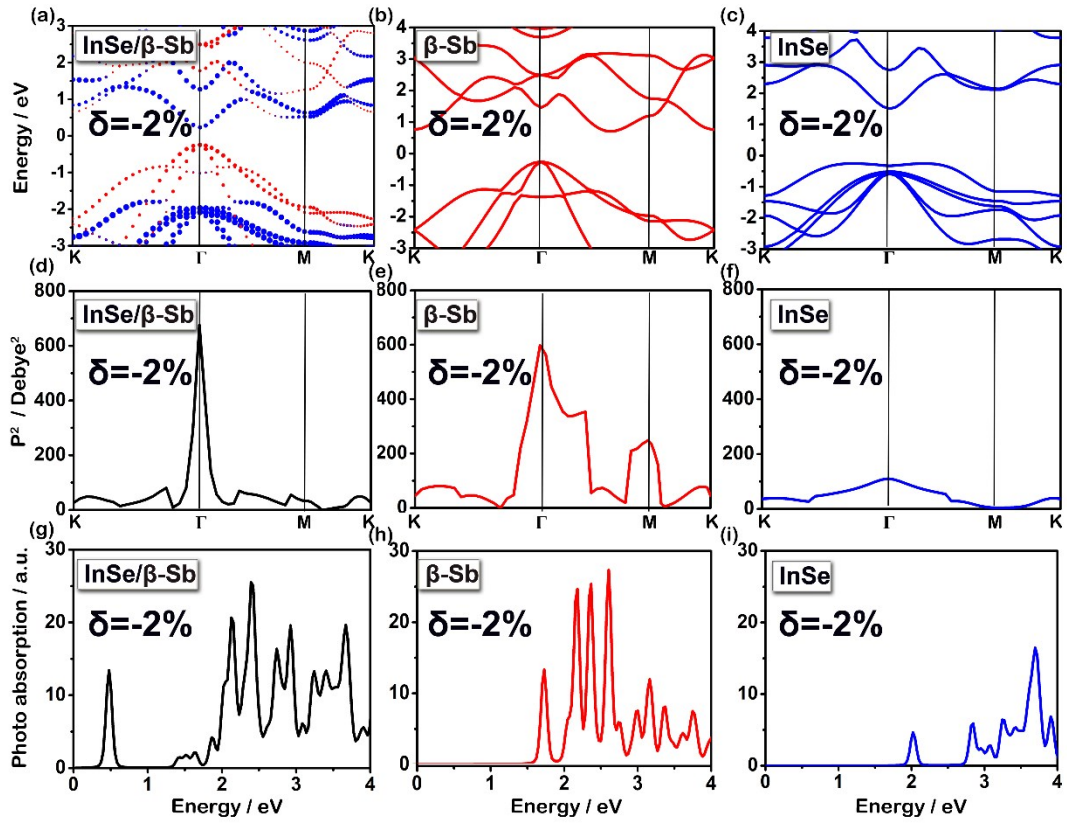

**Figure S7** Under lateral compressive stress  $-2\%$ : The band structure of (a) InSe/ $\beta$ -Sb heterostructure, (b)  $\beta$ -Sb and (c) InSe sublayer, respectively. The bands plotted in red and blue in (a) denote the bands dominated by  $\beta$ -Sb and InSe layer, respectively. The square of transition dipole moment between the highest valence band and the lowest conduction band for (d) InSe/ $\beta$ -Sb heterostructure, and individual (e)  $\beta$ -Sb, (f) InSe layers, respectively. Photo-absorption properties of (g) InSe/ $\beta$ -Sb heterostructure and individual (h)  $\beta$ -Sb, (i) InSe layers, respectively.

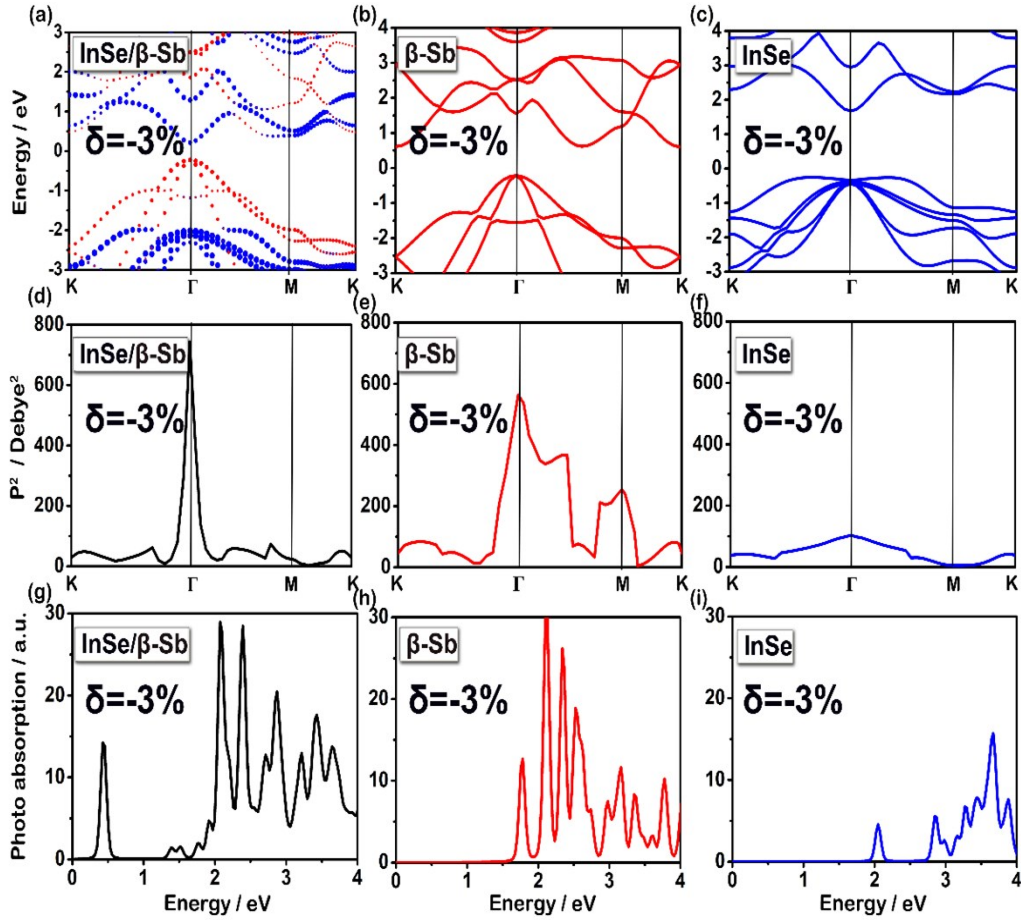

**Figure S8** Under lateral compressive stress -3%: The band structure of (a) InSe/β-Sb heterostructure, (b) β-Sb and (c) InSe sublayer, respectively. The bands plotted in red and blue in (a) denote the bands dominated by β-Sb and InSe layer, respectively. The square of transition dipole moment between the highest valence band and the lowest conduction band for (d) InSe/β-Sb heterostructure, and individual (e) β-Sb, (f) InSe layers, respectively. Photo-absorption properties of (g) InSe/β-Sb heterostructure and individual (h) β-Sb, (i) InSe layers, respectively.

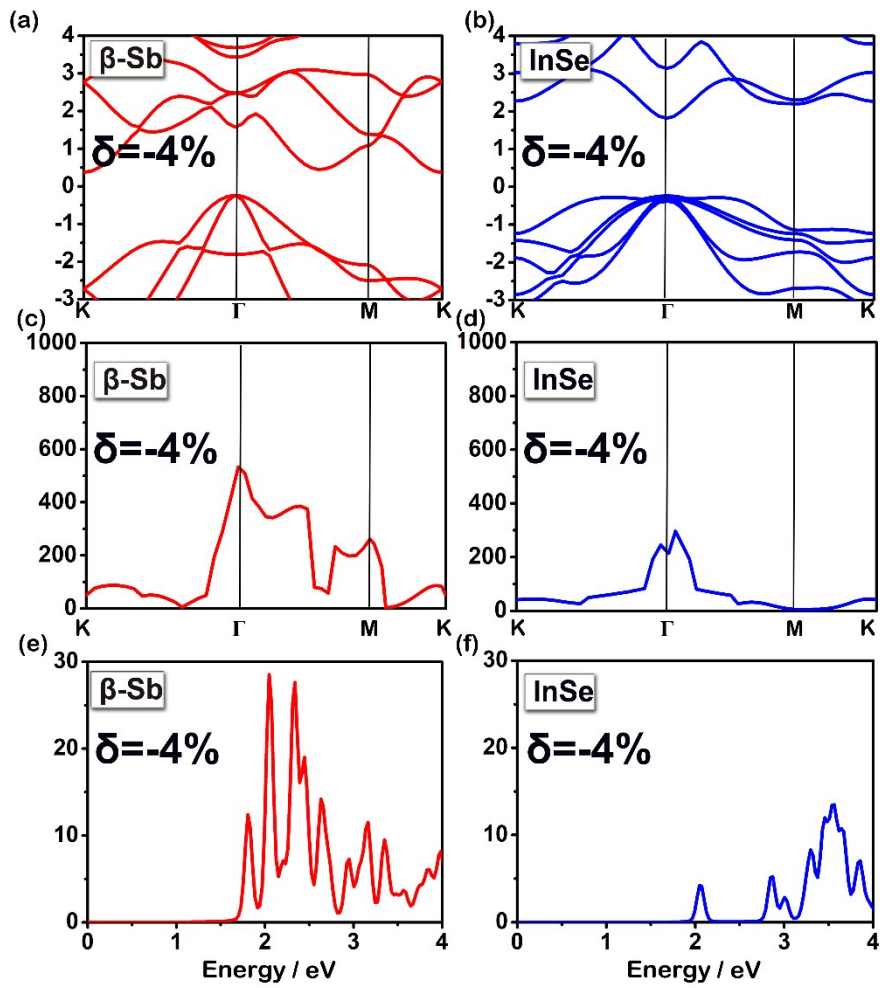

**Figure S9** Under lateral tensile stress -4%: The band structure of (a)  $\beta$ -Sb and (b) InSe sublayer, respectively.. The square of transition dipole moment between the highest valence band and the lowest conduction band for individual (c)  $\beta$ -Sb, (d) InSe layers, respectively. Photo-absorption properties of individual (e)  $\beta$ -Sb, (f) InSe layers, respectively.



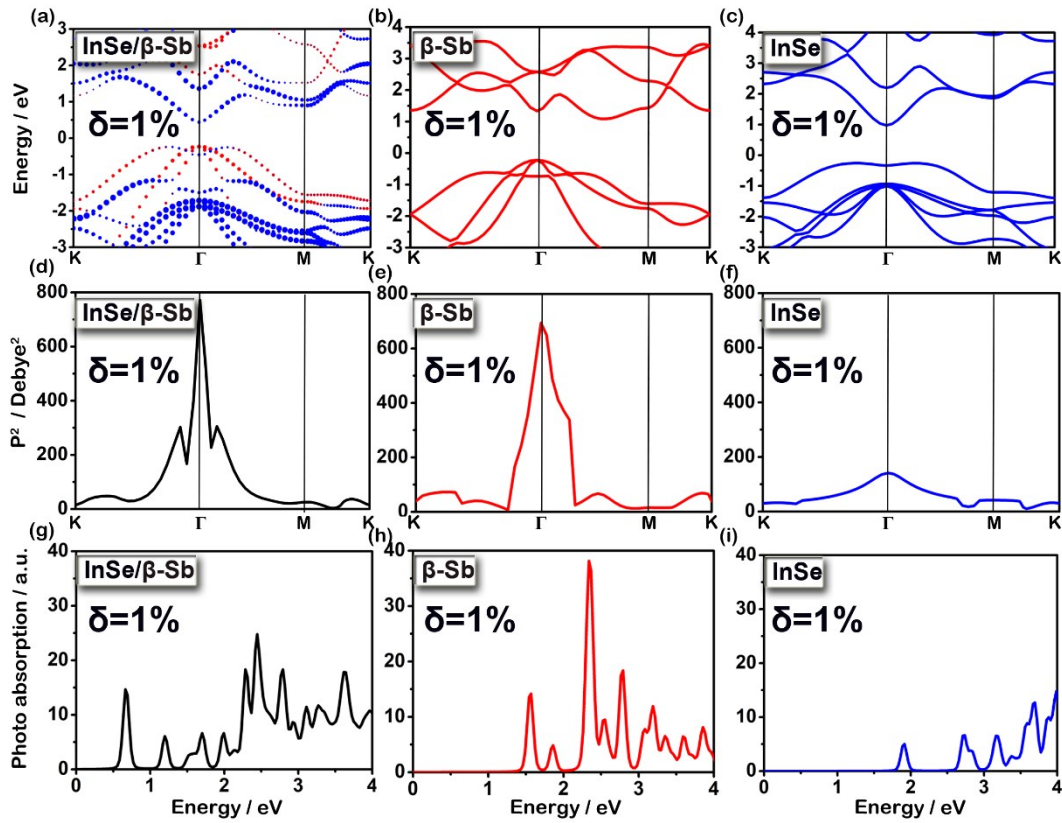

**Figure S10** Under lateral tensile stress 1%: The band structure of (a) InSe/β-Sb heterostructure, (b) β-Sb and (c) InSe sublayer, respectively. The bands plotted in red and blue in (a) denote the bands dominated by β-Sb and InSe layer, respectively. The square of transition dipole moment between the highest valence band and the lowest conduction band for (d) InSe/β-Sb heterostructure, and individual (e) β-Sb, (f) InSe layers, respectively. Photo-absorption properties of (g) InSe/β-Sb heterostructure and individual (h) β-Sb, (i) InSe layers, respectively.

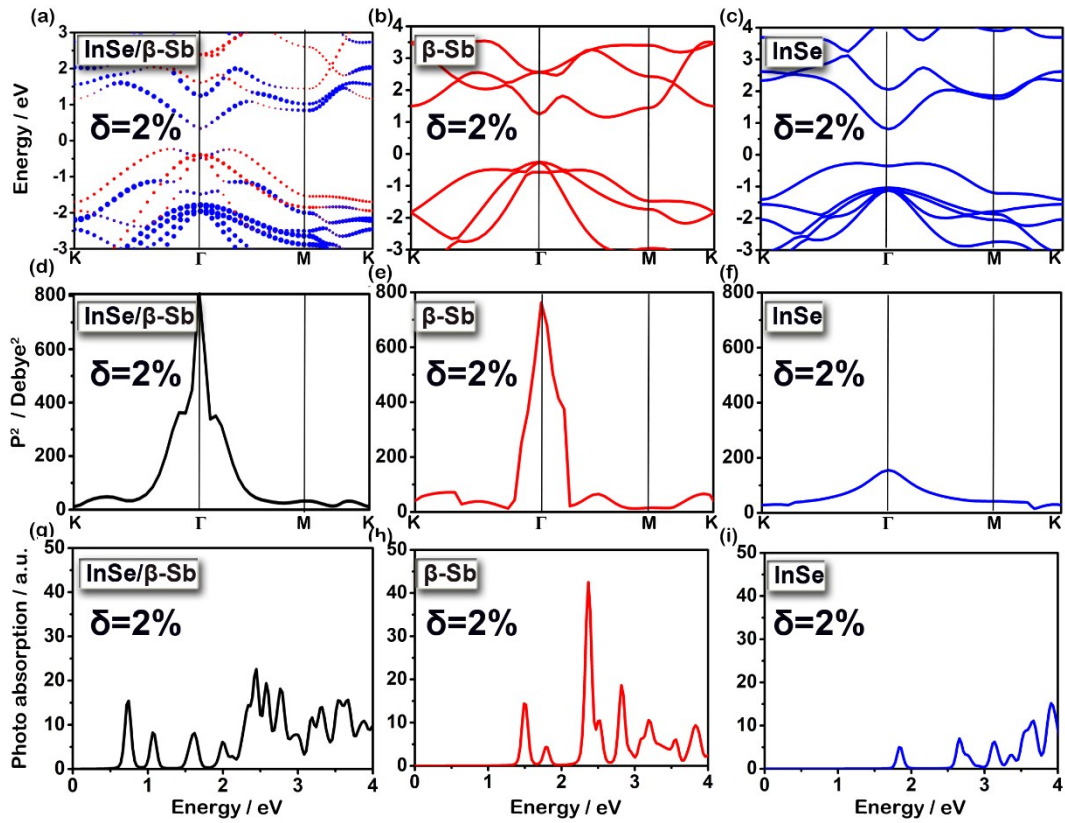

**Figure S11** Under lateral tensile stress 2%: The band structure of (a) InSe/β-Sb heterostructure, (b) β-Sb and (c) InSe sublayer, respectively. The bands plotted in red and blue in (a) denote the bands dominated by β-Sb and InSe layer, respectively. The square of transition dipole moment between the highest valence band and the lowest conduction band for (d) InSe/β-Sb heterostructure, and individual (e) β-Sb, (f) InSe layers, respectively. Photo-absorption properties of (g) InSe/β-Sb heterostructure and individual (h) β-Sb, (i) InSe layers, respectively.

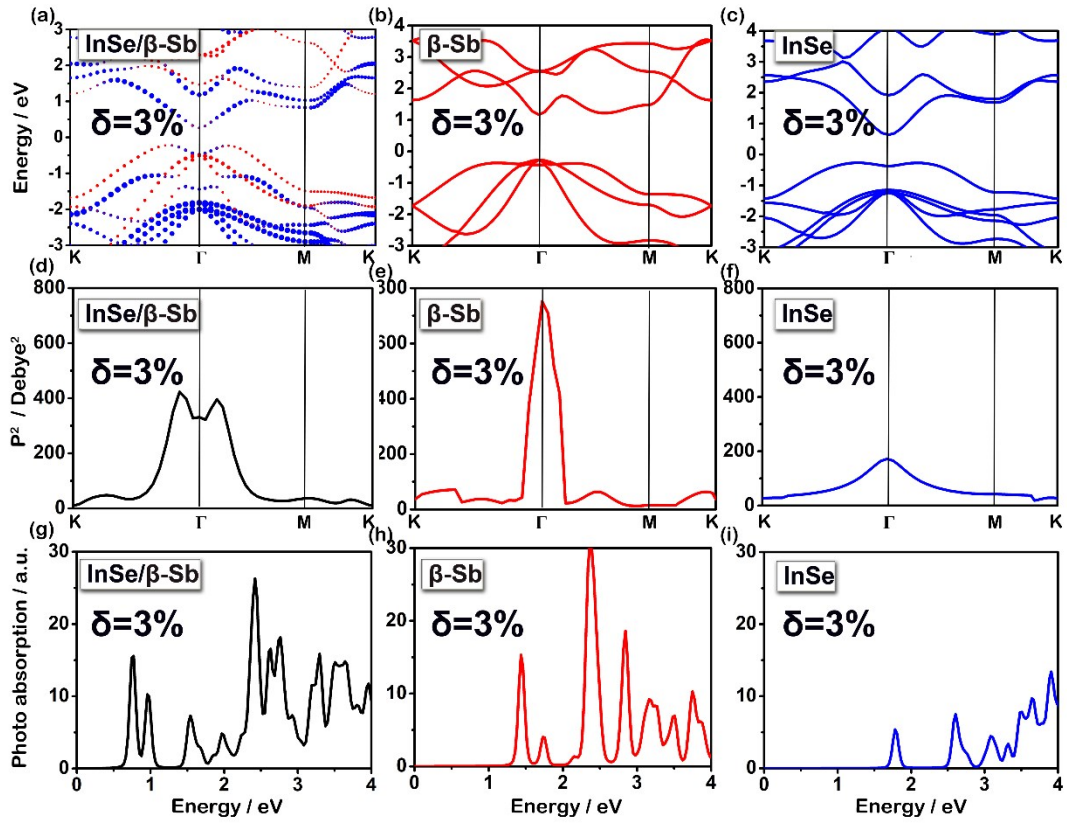

**Figure S12** Under lateral tensile stress 3%: The band structure of (a) InSe/β-Sb heterostructure, (b) β-Sb and (c) InSe sublayer, respectively. The bands plotted in red and blue in (a) denote the bands dominated by β-Sb and InSe layer, respectively. The square of transition dipole moment between the highest valence band and the lowest conduction band for (d) InSe/β-Sb heterostructure, and individual (e) β-Sb, (f) InSe layers, respectively. Photo-absorption properties of (g) InSe/β-Sb heterostructure and individual (h) β-Sb, (i) InSe layers, respectively.

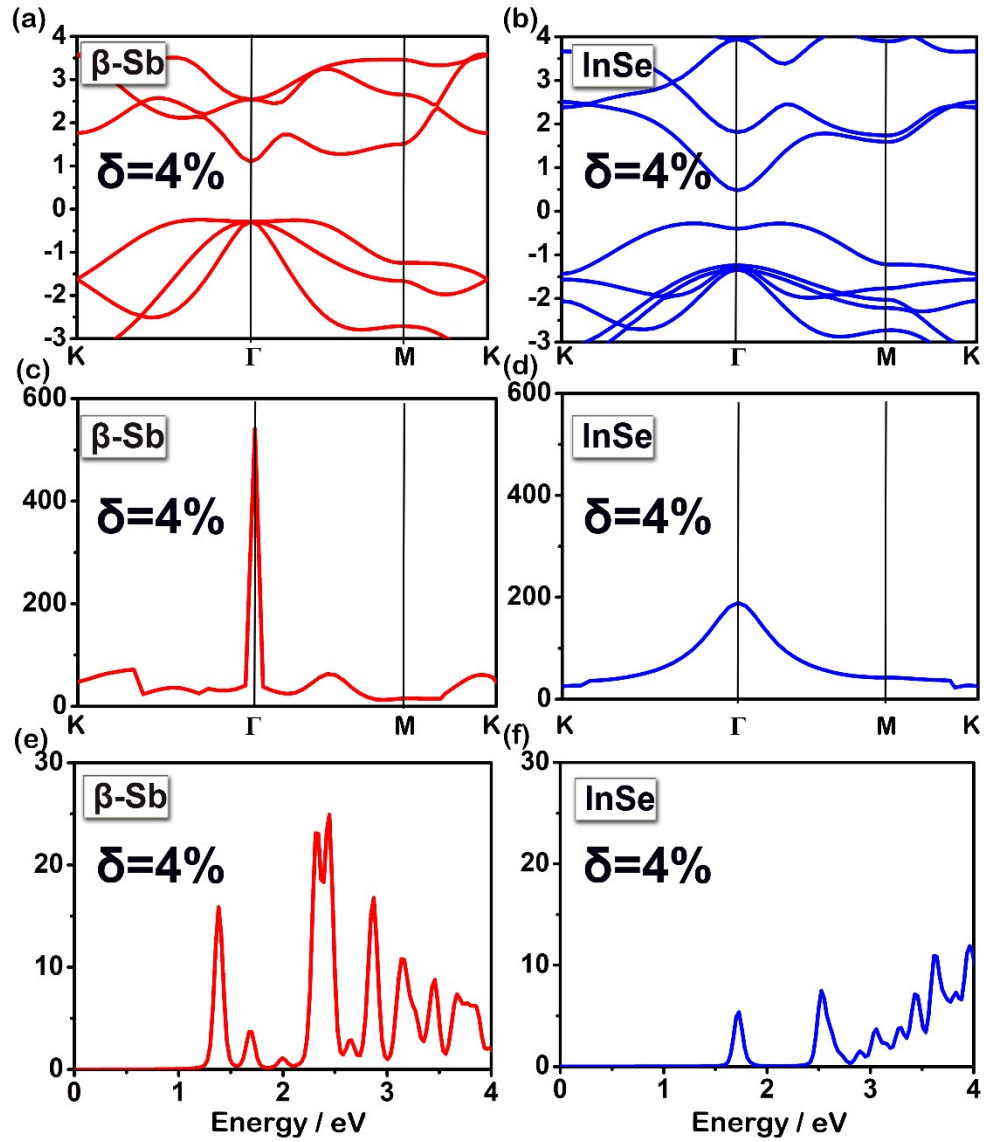

**Figure S13** Under lateral tensile stress 4%: The band structure of (a)  $\beta$ -Sb and (b) InSe sublayer, respectively.. The square of transition dipole moment between the highest valence band and the lowest conduction band for individual (c)  $\beta$ -Sb, (d) InSe layers, respectively. Photo-absorption properties of individual (e)  $\beta$ -Sb, (f) InSe layers, respectively.

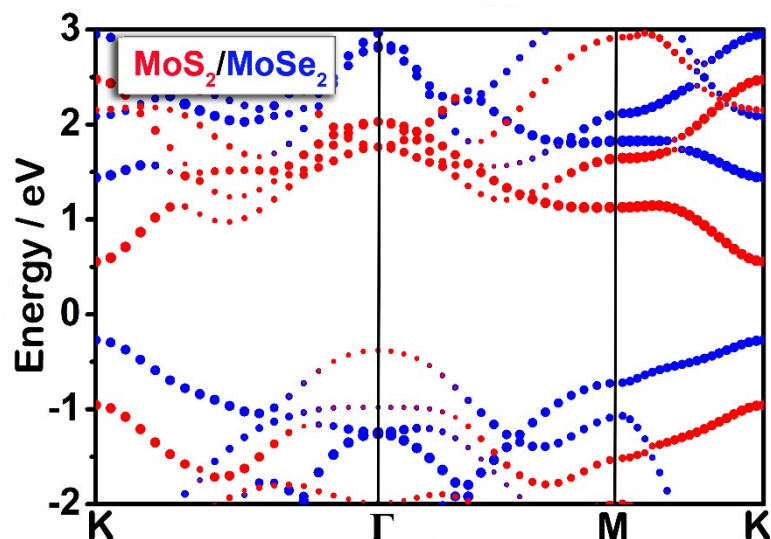

**Figure S14** Band structure of MoS<sub>2</sub>/MoSe<sub>2</sub> heterostructure. The bands plotted in red and blue denote the bands dominated by MoS<sub>2</sub> and MoSe<sub>2</sub> layer, respectively. The Fermi level is shifted to 0 eV. The unit cell of MoS<sub>2</sub> and MoSe<sub>2</sub> are used to construct the heterostructure. The lattice parameter of MoS<sub>2</sub>/MoSe<sub>2</sub> heterostructure is 3.23 Å, and the miss-matched rate is only 1.9%.

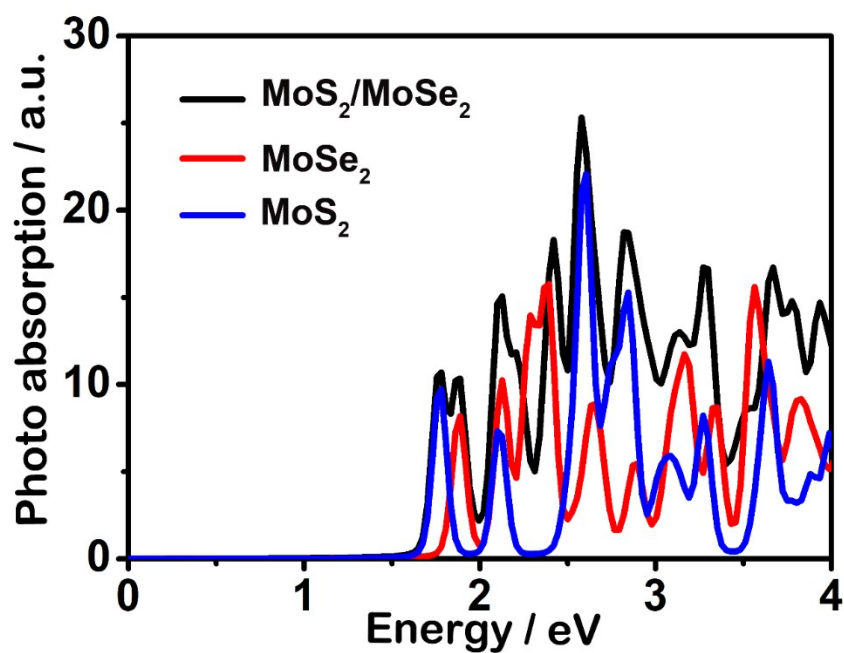

**Figure S15** Photo-absorption properties of individual MoS<sub>2</sub>, MoSe<sub>2</sub> layers, and MoS<sub>2</sub>/MoSe<sub>2</sub> heterostructure.

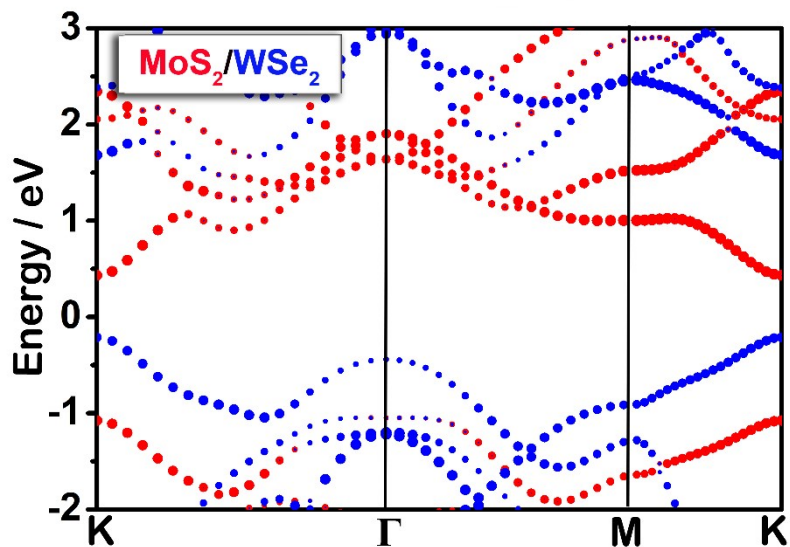

**Figure S16** Band structure of MoS<sub>2</sub>/WSe<sub>2</sub> heterostructure. The bands plotted in red and blue denote the bands dominated by MoS<sub>2</sub> and WSe<sub>2</sub> layer, respectively. The Fermi level is shifted to 0 eV. The unit cell of MoS<sub>2</sub> and WSe<sub>2</sub> are used to construct the heterostructure. The lattice parameter of MoS<sub>2</sub>/WSe<sub>2</sub> heterostructure is 3.23 Å, and the miss-matched rate is only 1.9%.

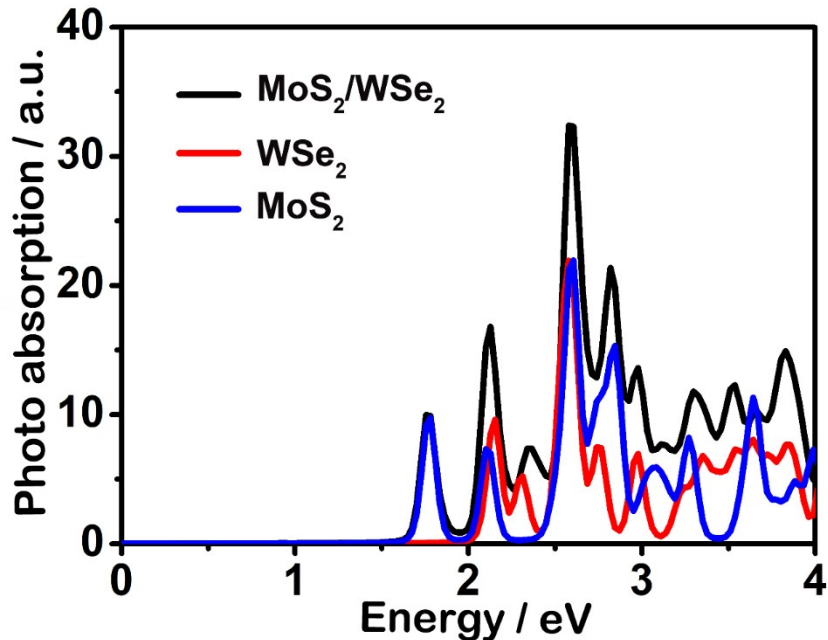

**Figure S17** Photo-absorption properties of individual MoS<sub>2</sub>, WSe<sub>2</sub> layers, and MoS<sub>2</sub>/WSe<sub>2</sub> heterostructure.

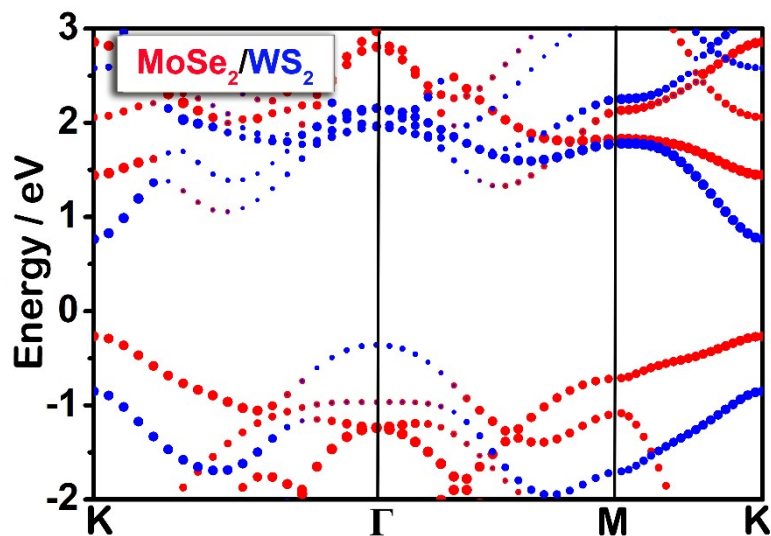

**Figure S18** Band structure of MoSe<sub>2</sub>/WS<sub>2</sub> heterostructure. The bands plotted in red and blue denote the bands dominated by MoSe<sub>2</sub> and WS<sub>2</sub> layer, respectively. The Fermi level is shifted to 0 eV. The unit cell of MoSe<sub>2</sub> and WS<sub>2</sub> are used to construct the heterostructure. The lattice parameter of MoSe<sub>2</sub>/WS<sub>2</sub> heterostructure is 3.23 Å, and the miss-matched rate is only 1.9%.

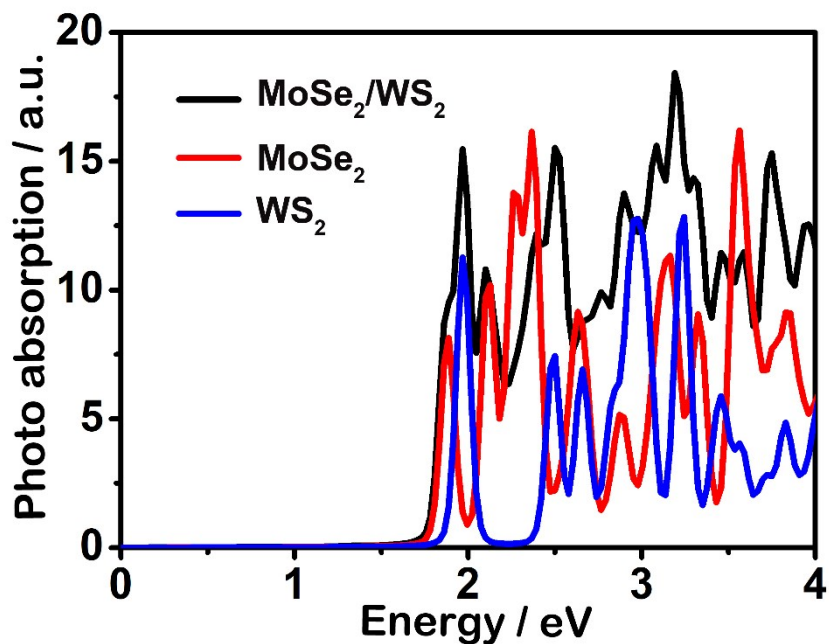

**Figure S19** Photo-absorption properties of individual MoSe<sub>2</sub>, WS<sub>2</sub> layers, and MoSe<sub>2</sub>/WS<sub>2</sub> heterostructure.

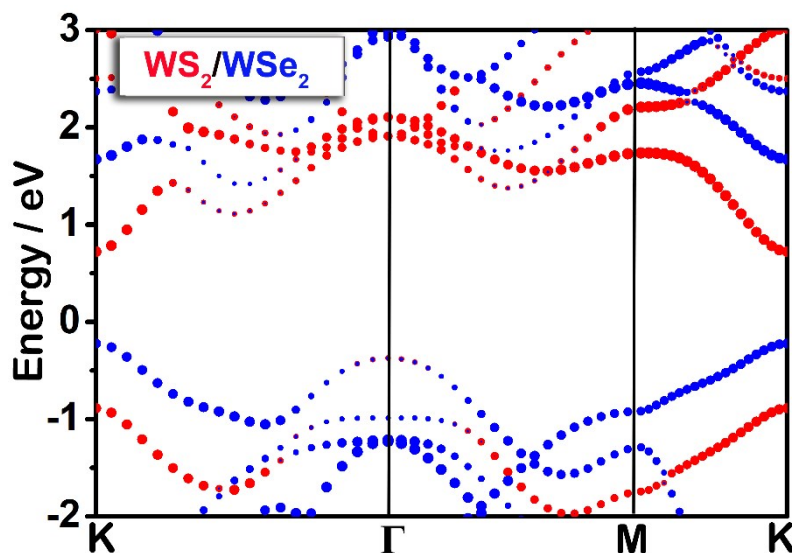

**Figure S20** Band structure of  $\text{WS}_2/\text{WSe}_2$  heterostructure. The bands plotted in red and blue denote the bands dominated by  $\text{WS}_2$  and  $\text{WSe}_2$  layer, respectively. The Fermi level is shifted to 0 eV. The unit cell of  $\text{WS}_2$  and  $\text{WSe}_2$  are used to construct the heterostructure. The lattice parameter of  $\text{WS}_2/\text{WSe}_2$  heterostructure is 3.23 Å, and the miss-matched rate is only 1.9%.

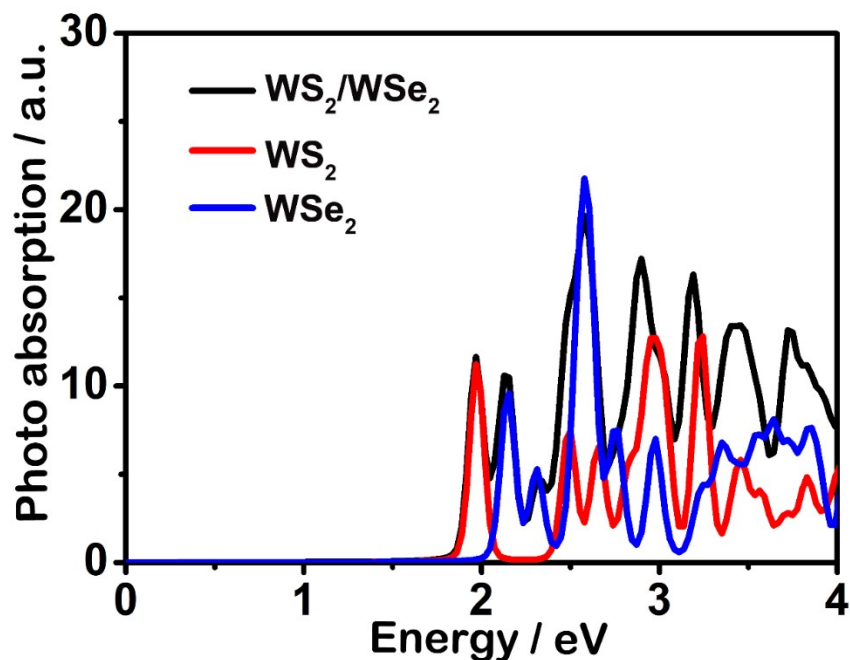

**Figure S21** Photo-absorption properties of individual  $\text{WS}_2$ ,  $\text{WSe}_2$  layers, and  $\text{WS}_2/\text{WSe}_2$  heterostructure.



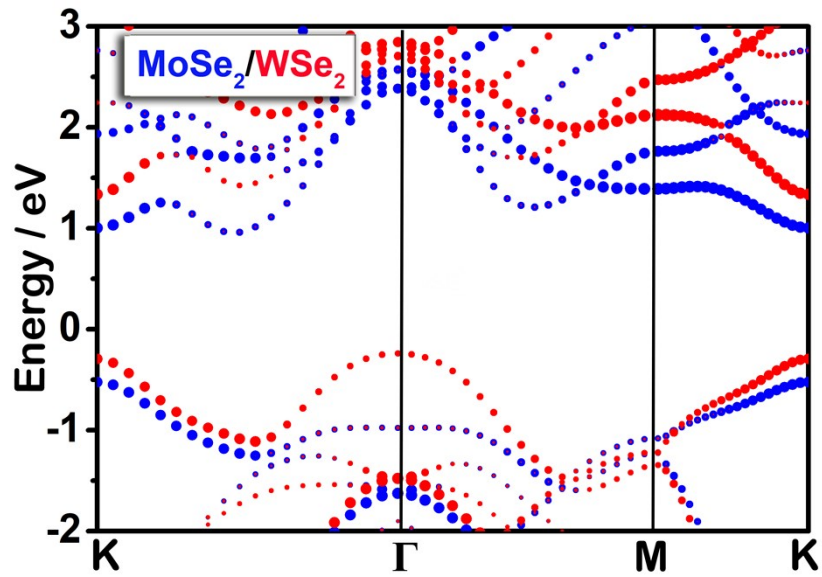

**Figure S22** Band structure of MoSe<sub>2</sub>/WSe<sub>2</sub> heterostructure. The bands plotted in red and blue denote the bands dominated by WS<sub>2</sub> and WSe<sub>2</sub> layer, respectively. The Fermi level is shifted to 0 eV. The unit cell of WS<sub>2</sub> and WSe<sub>2</sub> are used to construct the heterostructure. The lattice parameter of WS<sub>2</sub>/WSe<sub>2</sub> heterostructure is 3.29 Å, and there is no miss-matched rate.

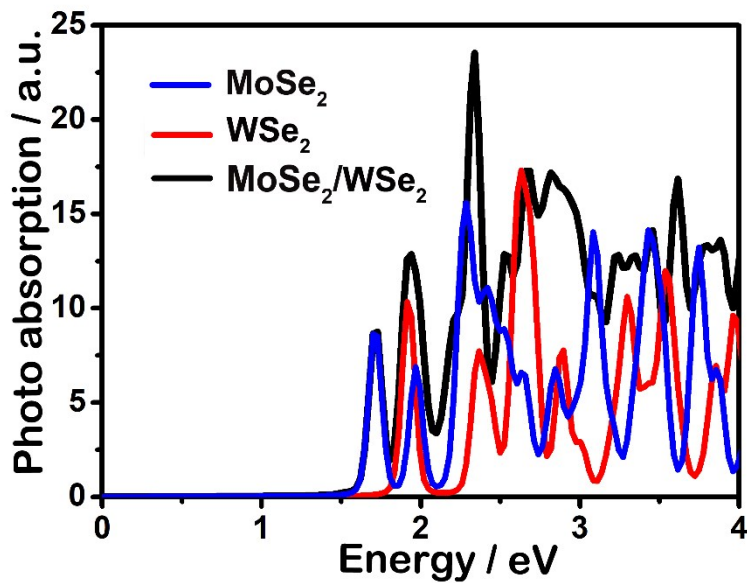

**Figure S23** Photo-absorption properties of individual MoSe<sub>2</sub>, WSe<sub>2</sub> layers, and MoSe<sub>2</sub>/WSe<sub>2</sub> heterostructure.

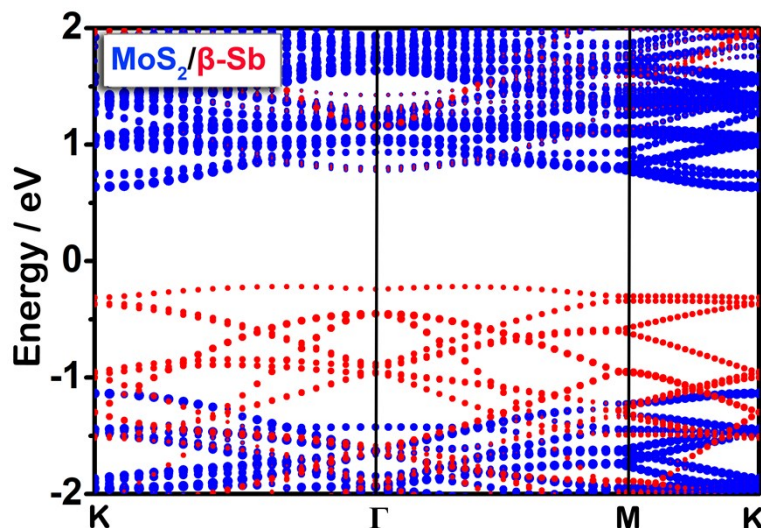

**Figure S24** Band structure of MoS<sub>2</sub>/β-Sb heterostructure. The bands plotted in red and blue denote the bands dominated by β-Sb and MoS<sub>2</sub> layer, respectively. The Fermi level is shifted to 0 eV. The 3×3 supercell of β-Sb and the 4×4 supercell of MoS<sub>2</sub> are used to construct the heterostructure. The lattice parameter of MoS<sub>2</sub>/β-Sb heterostructure is 12.61 Å, and the miss-matched rate is only 2%.

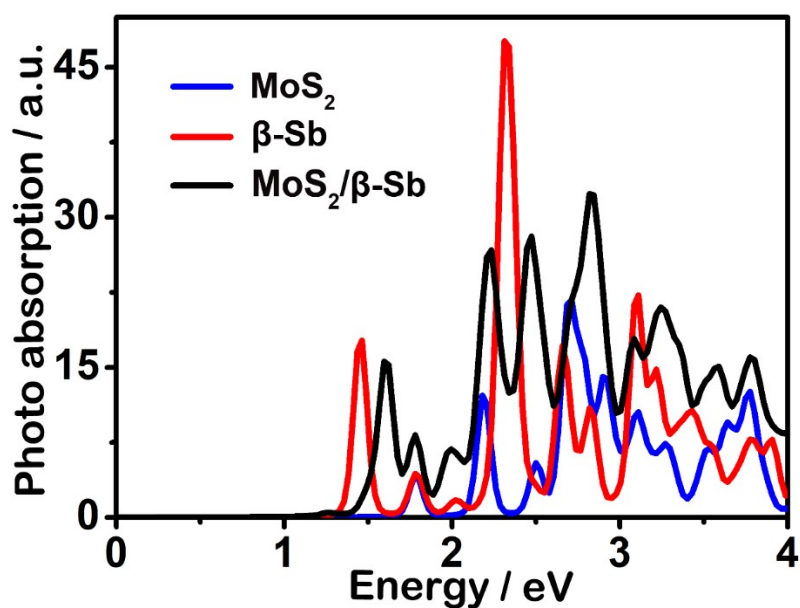

**Figure S25** Photo-absorption properties of individual MoS<sub>2</sub>, β-Sb layers, and MoS<sub>2</sub>/β-Sb heterostructure.

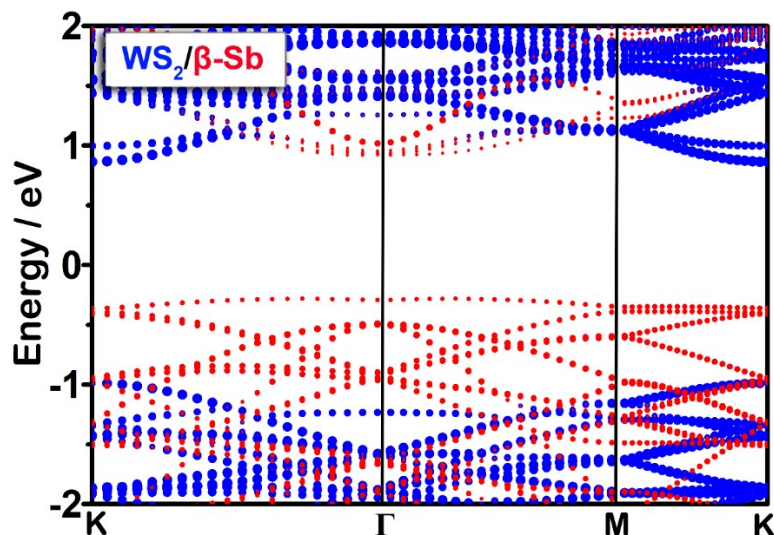

**Figure S26** Band structure of  $\text{WS}_2/\beta\text{-Sb}$  heterostructure. The bands plotted in red and blue denote the bands dominated by  $\beta\text{-Sb}$  and  $\text{WS}_2$  layer, respectively. The Fermi level is shifted to 0 eV. The  $3\times 3$  supercell of  $\beta\text{-Sb}$  and the  $4\times 4$  supercell of  $\text{WS}_2$  are used to construct the heterostructure. The lattice parameter of  $\text{WS}_2/\beta\text{-Sb}$  heterostructure is 12.68 Å, and the miss-matched rate is only 2.5%.

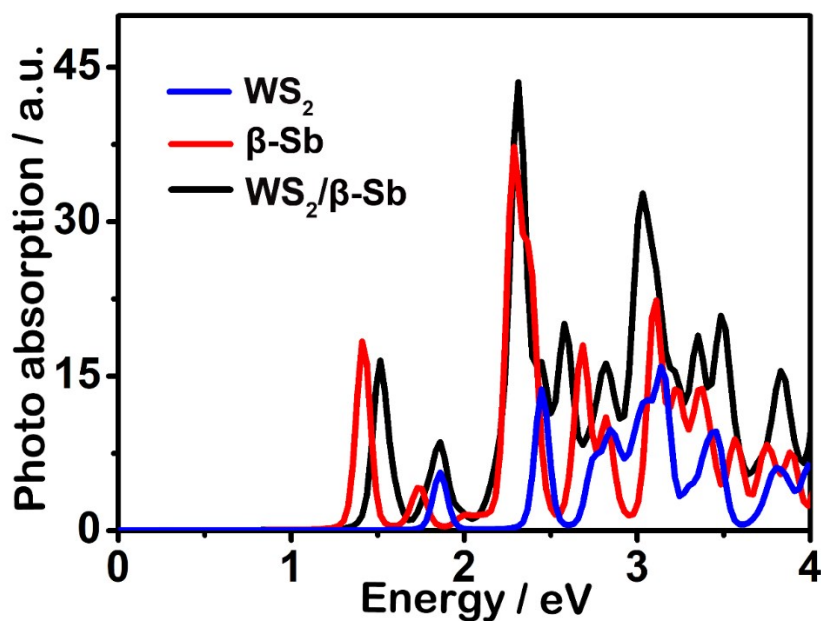

**Figure S27** Photo-absorption properties of individual  $\text{WS}_2$ ,  $\beta\text{-Sb}$  layers, and  $\text{WS}_2/\beta\text{-Sb}$  heterostructure.

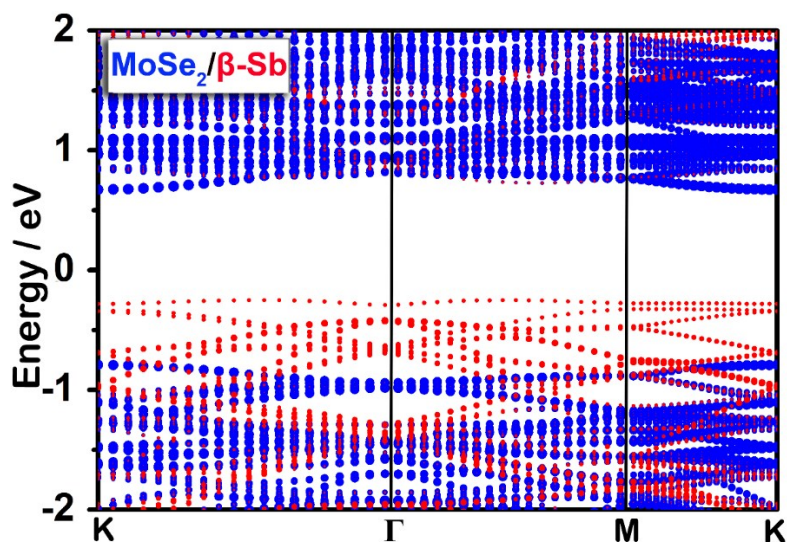

**Figure S28** Band structure of MoSe<sub>2</sub>/β-Sb heterostructure. The bands plotted in red and blue denote the bands dominated by β-Sb and MoSe<sub>2</sub> layer, respectively. The Fermi level is shifted to 0 eV. The 4×4 supercell of β-Sb and the 5×5 supercell of MoSe<sub>2</sub> are used to construct the heterostructure. The lattice parameter of MoSe<sub>2</sub>/β-Sb heterostructure is 16.54 Å, and the miss-matched rate is only 0.5%.

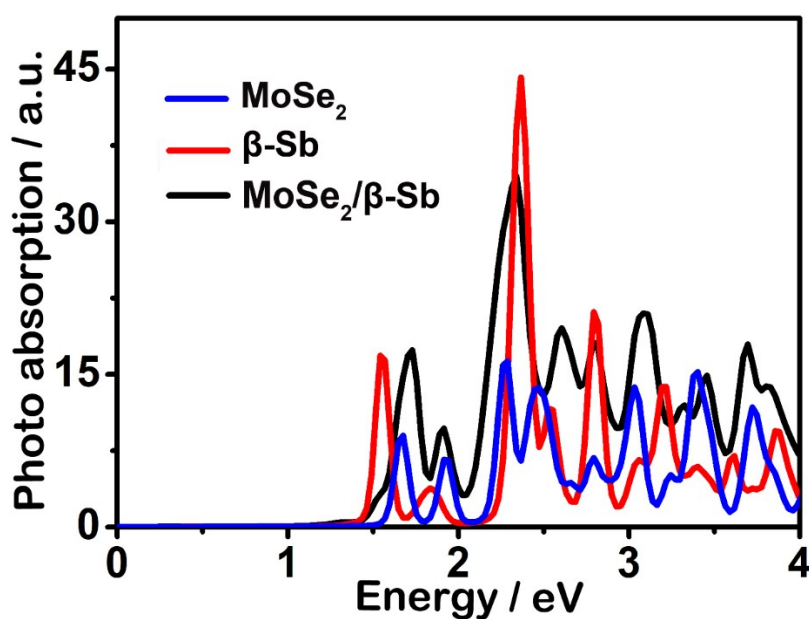

**Figure S29** Photo-absorption properties of individual MoSe<sub>2</sub>, β-Sb layers, and MoSe<sub>2</sub>/β-Sb heterostructure.

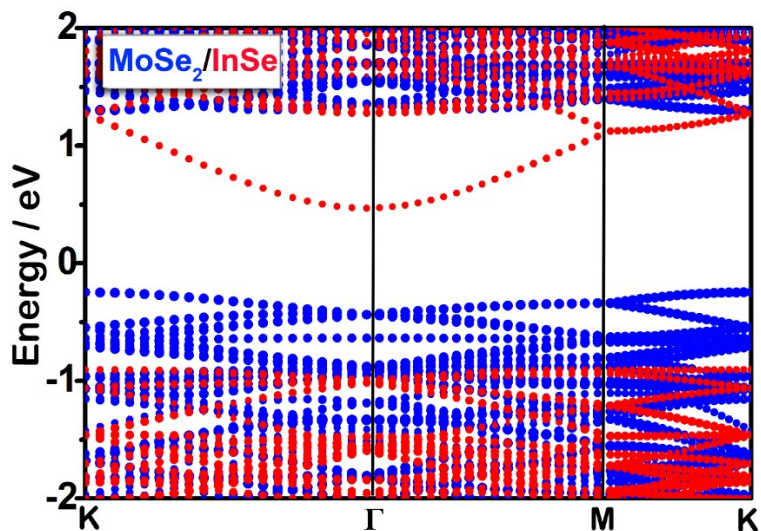

**Figure S30** Band structure of MoSe<sub>2</sub>/InSe heterostructure. The bands plotted in red and blue denote the bands dominated by InSe and MoSe<sub>2</sub> layer, respectively. The Fermi level is shifted to 0 eV. The 4×4 supercell of InSe and the 5×5 supercell of MoSe<sub>2</sub> are used to construct the heterostructure. The lattice parameter of MoSe<sub>2</sub>/InSe heterostructure is 16.41 Å, and the miss-matched rate is only 0.8%.

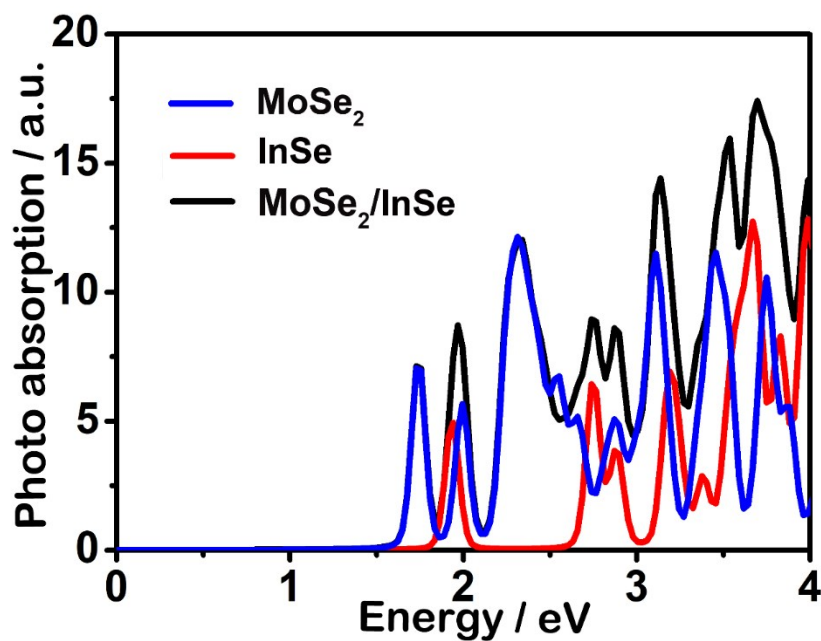

**Figure S31** Photo-absorption properties of individual MoSe<sub>2</sub>, InSe layers, and MoSe<sub>2</sub>/InSe heterostructure.

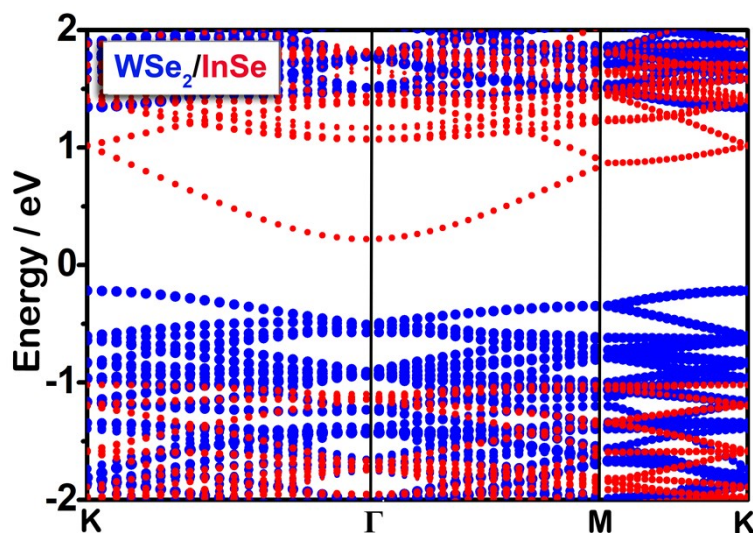

**Figure S32** Band structure of  $\text{WSe}_2/\text{InSe}$  heterostructure. The bands plotted in red and blue denote the bands dominated by InSe and  $\text{WSe}_2$  layer, respectively. The Fermi level is shifted to 0 eV. The  $4 \times 4$  supercell of InSe and the  $5 \times 5$  supercell of  $\text{WSe}_2$  are used to construct the heterostructure. The lattice parameter of  $\text{WSe}_2/\text{InSe}$  heterostructure is 16.50 Å, and the miss-matched rate is only 1.3%.

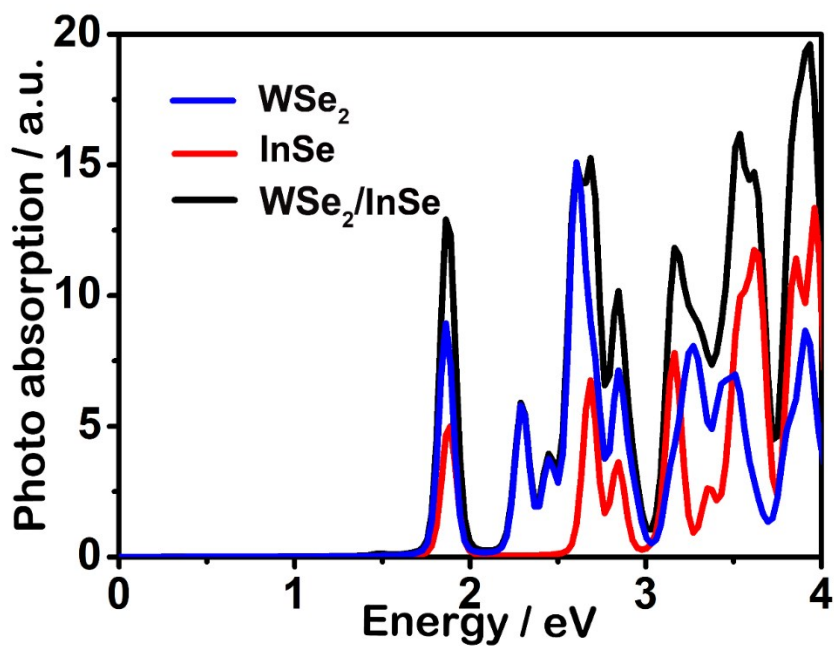

**Figure S33** Photo-absorption properties of individual  $\text{WSe}_2$ , InSe layers, and  $\text{WSe}_2/\text{InSe}$  heterostructure.

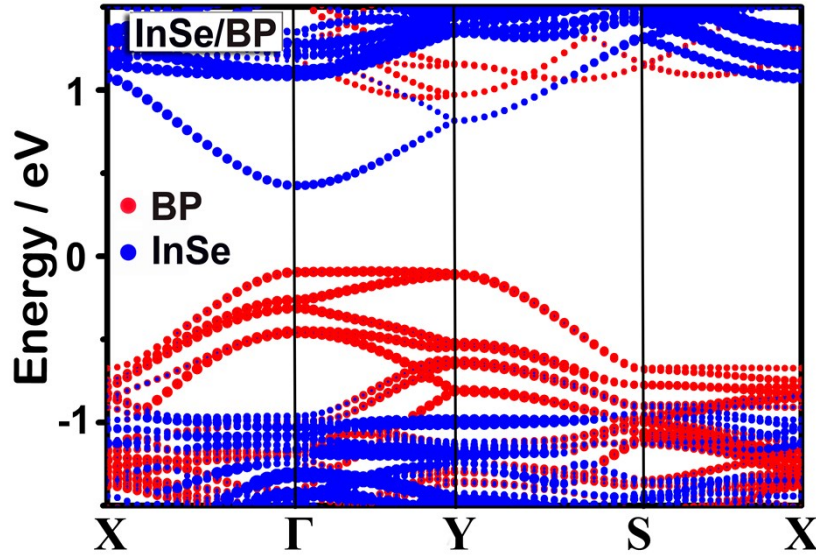

**Figure S34** Band structure of InSe/BP heterostructure. The bands plotted in red and blue denote the bands dominated by BP and InSe layer, respectively. The Fermi level is shifted to 0 eV. The rectangular supercell cell is constructed using a  $3 \times 5$  unit rectangular cell of BP and a  $2 \times 4$  unit rectangular cell of InSe to minimize the lattice mismatch. The lattice parameters of the BP/InSe supercell are determined as 13.8 and 16.4 Å in the x and y directions, respectively, which induces a maximum strain in both the BP and InSe lattices of  $\sim 2\%$ .

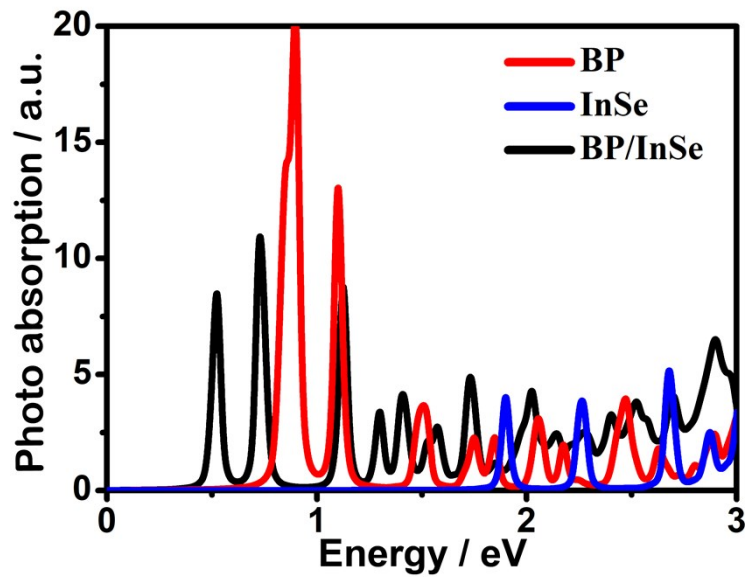

**Figure S35** Photo-absorption properties of individual InSe, BP layers, and InSe/BP heterostructure.

To explore optical properties, we employ the energy-dependent dielectric functions to investigate the optical absorption of isolate InSe,  $\beta$ -Sb layer, and InSe/ $\beta$ -Sb heterostructure. The dielectric matrix is determined by the following equation, <sup>1</sup>

$$\varepsilon_{\alpha\beta}(\omega) = \frac{4\pi^2 e^2}{\Omega} \lim_{q \rightarrow 0} \frac{1}{q^2} \sum_{c,v,k} 2w_k \delta(\varepsilon_{ck} - \varepsilon_{vk} - \omega) \times \langle u_{ck+e_\alpha q} | u_{vk} \rangle \langle u_{ck+e_\beta q} | u_{vk} \rangle^* \quad (1)$$

Where  $\Omega$  is the volume of the primitive cell,  $q$  is the electron momentum operator,  $v$  and  $c$  are the valence and conduction band states, respectively,  $w_k$  is the  $k$  point weight,  $\varepsilon_{ck}$ ,  $\varepsilon_{vk}$  and  $\mu_{ck}$ ,  $\mu_{vk}$  are the eigenvalues and wave-functions at the  $k$  point, respectively, and  $e_\alpha$ ,  $e_\beta$  are the unit vectors for the three Cartesian directions.

The binding energy is defined as  $E_b = E_{\text{InSe}} + E_{\beta\text{-Sb}} - E_{\text{InSe}/\beta\text{-Sb}}$ , where,  $E_{\text{InSe}}$ ,  $E_{\beta\text{-Sb}}$  and  $E_{\text{InSe}/\beta\text{-Sb}}$  represent the total energy of isolated InSe and  $\beta$ -Sb monolayer, and InSe/ $\beta$ -Sb heterostructure, respectively.

## References

- 1 Gajdoš, M., Hummer, K., Kresse, G., Furthmüller, J. & Bechstedt, F. Linear Optical Properties in The Projector-augmented Wave Methodology. *Phys. Rev. B* **73**, 045112 (2006).
